# Supplementary material
Source: PubMed Central journal article supplement (PMC6497959)
Supplement: supp_RA119.007671_143292_0_supp_290331_pnjcb0.pdf [file supp_RA119.007671_143292_0_supp_290331_pnjcb0.pdf]

**A novel triazole NMK-T-057 induces autophagic cell death in breast cancer cells by inhibiting  $\gamma$ -secretase-mediated activation of Notch-signaling.**

**Amlan Das<sup>1,2\*</sup>, Maruthi Kumar Narayanam<sup>3,9±</sup>, Santanu Paul<sup>1±</sup>, Pritha Mukherjee<sup>4±</sup>, Suvranil Ghosh<sup>5</sup>, Debabrata Ghosh Dastidar<sup>1,6</sup>, Subhendu Chakrabarty<sup>1</sup>, Arnab Ganguli<sup>1</sup>, Biswarup Basu<sup>7</sup>, Mahadeb Pal<sup>5</sup>, Urmi Chatterji<sup>4</sup>, Sushanta K Banerjee<sup>8,9</sup>, Parimal Karmakar<sup>11</sup>, Dalip Kumar<sup>3\*</sup> and Gopal Chakrabarti<sup>1\*</sup>**

± Authors have contributed equally.

From: <sup>1</sup>Department of Biotechnology and Dr. B.C. Guha Centre for Genetic Engineering and Biotechnology, University of Calcutta, 35 Ballygunge Circular Road, Kolkata 700019, WB, India; <sup>2</sup>Department of Chemistry, National Institute of Technology, Ravangla, South Sikkim, 737139, India; <sup>3</sup>Department of Chemistry, Birla Institute of Technology and Science, Pilani, Rajasthan 333031, India ; <sup>4</sup>Department of Zoology, University of Calcutta, 35 Ballygunge Circular Road, Kolkata 700019, WB, India; <sup>5</sup>Division of Molecular medicine, P-1/12, CIT Rd, Scheme VIIM, Kankurgachi, Kolkata, West Bengal 700054, India; <sup>6</sup>Division of Pharmaceutics, Guru Nanak Institute of Pharmaceutical Science and Technology, 157/F Nilgunj Road, Panihati, Kolkata 700114, WB, India; <sup>7</sup>Chittaranjan National Cancer Institute, 37, Shyama Prasad Mukherjee Rd, Bakul Bagan, Kalighat, Kolkata, West Bengal 700026, India.; <sup>8</sup>Cancer Research Unit, VA Medical Center, Kansas City, MO, USA and <sup>9</sup>Department of Anatomy and Cell Biology and Pathology, University of Kansas Medical Center, Kansas City, MO, USA. <sup>10</sup>Department of Molecular and Medical Pharmacology and Crump Institute for Molecular Imaging, David Geffen School of Medicine, University of California, Los Angeles, CA 90095, USA. <sup>11</sup> Department Life Science & Biotechnology, Jadavpur University, 188 Raja S.C. Mullick Road, Kolkata,

**Running title:** NMK-T-057 inhibits  $\gamma$ -secretase mediated Notch activation

\*To whom correspondence should be addressed:

Gopal Chakrabarti, PhD. Department of Biotechnology and Dr. B.C. Guha Centre for Genetic Engineering and Biotechnology, University of Calcutta; 35 Ballygunge Circular Road, Kolkata, 700 019, WB, India; gcbcg@caluniv.ac.in; Telephone: 91-33-2461-5445; Fax : 91-33-2461-4849

Or

Amlan Das, Ph.D. Department of Biotechnology and Dr. B.C. Guha Centre for Genetic Engineering and Biotechnology, University of Calcutta, 35 Ballygunge Circular Road, Kolkata 700019, WB, India; Telephone: 91-33-2461-5445; Fax : 91-33-2461-484 and Department of Chemistry, National Institute of Technology, Ravangla, South Sikkim, 737139, India; adas1980@nitsikkim.ac.in; Telephone : +91 8670364931; Fax : +91 03595 260042

Or

Dalip Kumar, Ph.D. Department of Chemistry, Birla Institute of Technology and Science, Pilani, 333031, Rajasthan, India; dalipk@pilani.bits-pilani.ac.in; Telephone: 91-1596-24507; Fax : 91-1596-244183

**Table I: *In vivo* toxicity assessment of NMK doses in Swiss Albino mice**

| Parameters                                                   | GRP- I<br>Control | GRP- II: NMK-T-057<br>(25 mg/kg / BW) | GRP III: NMK-T-057<br>(50 mg/kg / BW) |
|--------------------------------------------------------------|-------------------|---------------------------------------|---------------------------------------|
| Body weight (g)                                              | 26.02 ± 0.9       | 24.14 ± 1.7                           | 24.88 ± 2.27                          |
| Hb (g/dl)                                                    | 15.66 ± 0.7       | 14.98 ± 0.6                           | 14 ± 0.7                              |
| Total WBC count (X 10 <sup>3</sup> cells/ mm <sup>3</sup> )  | 6413 ± 0.7        | 6140 ± 0.6                            | 5167 ± 2                              |
| Total RBC blood ( X 10 <sup>6</sup> cells/ mm <sup>3</sup> ) | 5.5 ± 0.8         | 5.22 ± 0.7                            | 5.42 ± 0.6                            |
| Neutrophil %                                                 | 40.5 ± 6          | 41.5 ± 4.3                            | 35.5 ± 4*                             |
| Lymphocyte %                                                 | 51.5 ± 4          | 50.5 ± 6.7                            | 40.5 ± 6*                             |
| Monocyte %                                                   | 1.3 ± 0.7         | 1.6 ± 0.6                             | 1.7 ± 1.1                             |
| Eosinophil %                                                 | 0.9 ± 0.8         | 1.2 ± 0.7                             | 1.4 ± 0.5*                            |
| Basophil %                                                   | 0.2 ± 0.5         | 0.4 ± 0.6*                            | 0.4 ± 0.6*                            |
| SGPT (U/l)                                                   | 32±3.2            | 35±4                                  | 40±3.7*                               |
| SGOT (U/l)                                                   | 84±4.3            | 90±3.5                                | 105±4.1*                              |
| ALP (U/l)                                                    | 110±10.1          | 115±5.7                               | 118±5.0                               |

**Table I:** Haematology and hepatic parameters of control and NMK-T-50 treated Swiss Albino mice (25 mg/kg body weight and 50 mg/kg body weight, 7 days treatment). Impact on the hematological parameters such as Hb, RBC, WBC, Neutrophil %, Monocyte % and Eosinophil % and hepatic parameters such as SGOT, SGPT and ALP, were monitored in each group † Results expressed as mean ± S.D. (n=5).

**Table II : Details of interactions of ligands docked at  $\gamma$ -Secretase (PDB ID: 5FN2)**

| Docked molecule      | Interaction Type |                         |             |                |                                                                                             |                                                                   |                                        |
|----------------------|------------------|-------------------------|-------------|----------------|---------------------------------------------------------------------------------------------|-------------------------------------------------------------------|----------------------------------------|
|                      | Hydrogen bond    |                         | Hydrophobic |                |                                                                                             |                                                                   | Van der Waals                          |
|                      | Conventional     | Carbon Hydrogen         | Pi-Sigma    | Pi-Pi T-Shaped | Alkyl                                                                                       | Pi-Alkyl                                                          |                                        |
| DAPT<br>-7Kcal/mole  | --               | --                      | PHE (C21)   | PHE (B411)     | ALA (C39)<br>VAL (B412)<br>LEU (B415)<br>VAL (C36)<br>LEU (C35)<br>ILE (C127)<br>ILE (C128) | ILE (B408)                                                        | VAL (C32)<br>VAL (C131)                |
| NMKT<br>-8 kcal/mole | TYR (C119)       | SER (A683)<br>PRO (C16) | LEU (C169)  | PHE (C173)     | --                                                                                          | LEU (C20)<br>ILE (A690)<br>VAL (C176)<br>ALA (C228)<br>ALA (C232) | THR (C172)<br>PHE (A698)<br>THR (A687) |

**Table II:** Different interactions stabilizing the binding of DAPT and NMK-T-057 to  $\gamma$ -Secretase (PDB ID: 5FN2)

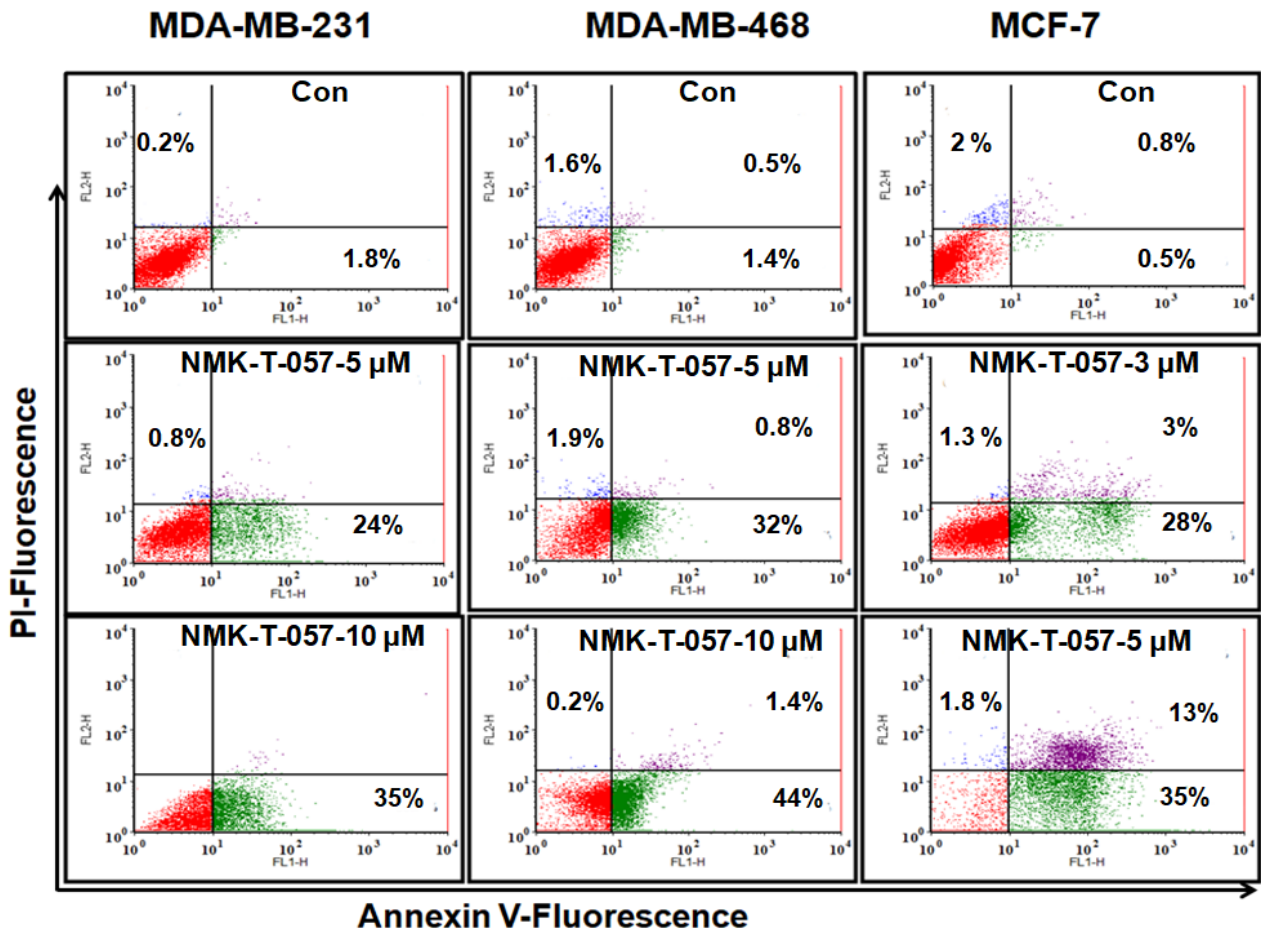

Fig.S1. Induction of apoptosis in BC cells by NMK-T-057

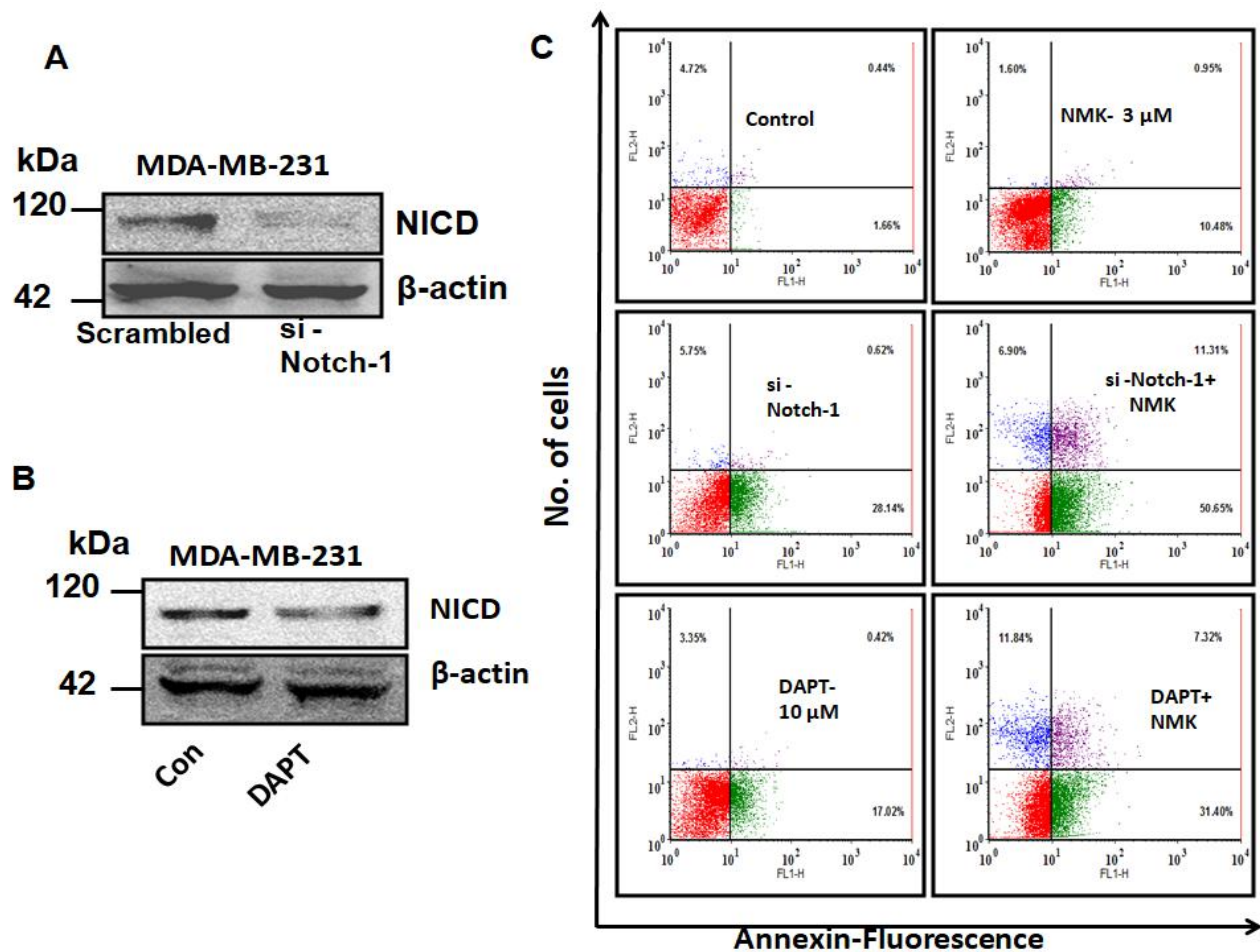

**Fig. S2.** Depletion of Notch induces apoptosis in MDA-MB-231 cells. A. NICD-expression in MDA-MB-231 cells transfected with scrambled/ siNotch-1 (This blot is also used as Fig. 5C in the main text). B. NICD-expression in MDA-MB-231 cells treated with DAPT. C. Induction of apoptosis in Notch-depleted MDA-MB-231 cells alone or in combination with NMK-T-057.

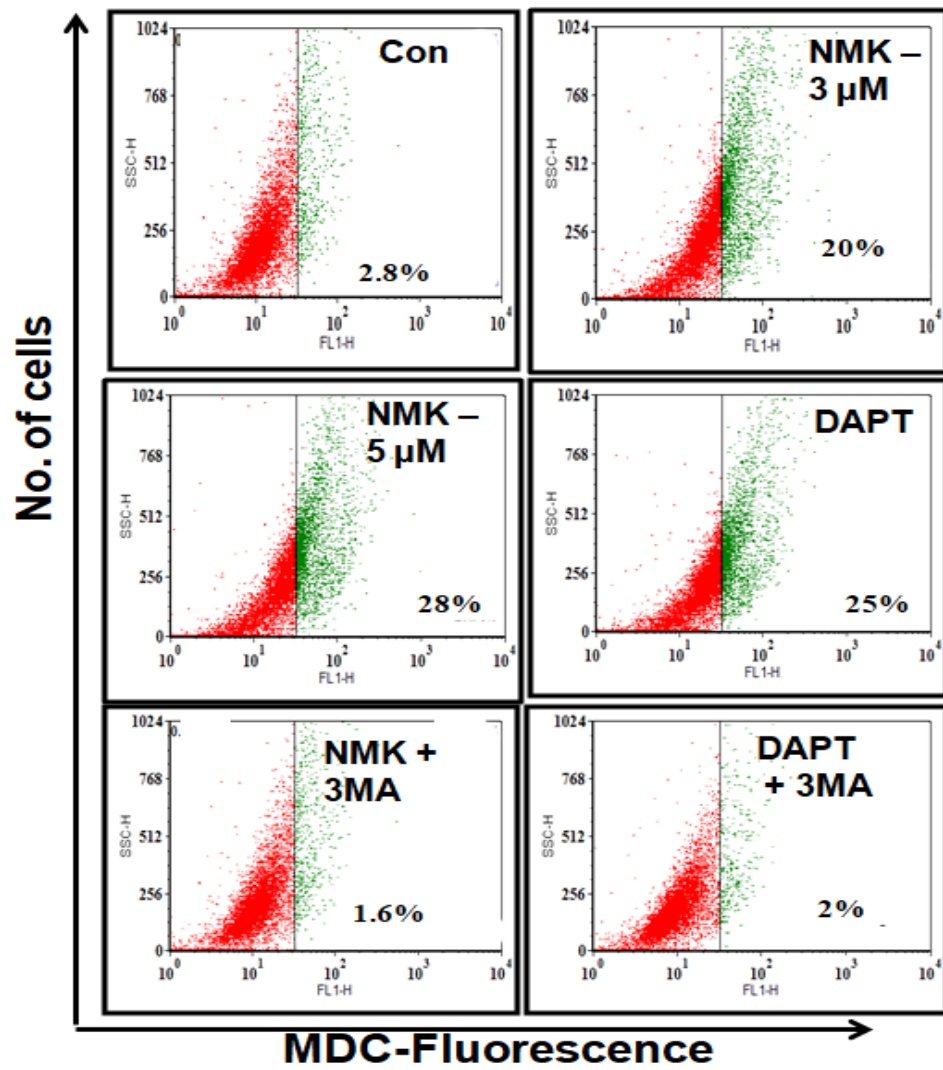

**Fig. S3:** FACS analysis of autophagic population stained with MDC in control and DAPT/NMK-treated MDA-MB-231 cells, in the absence and presence of the autophagy inhibitor 3-MA, presented as dot plot.

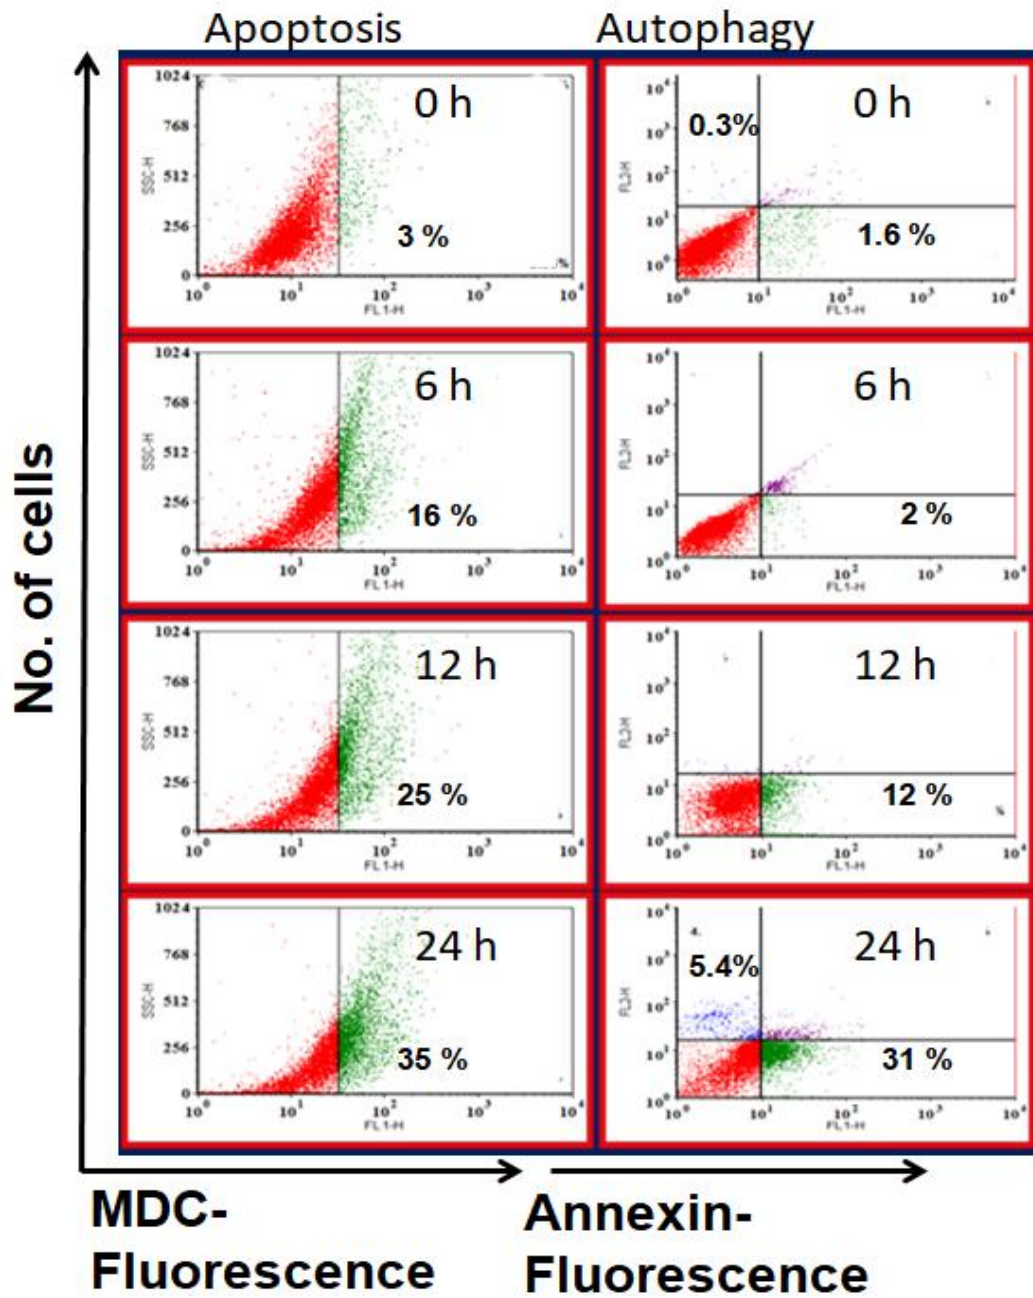

**Fig. S4:** FACS analysis of time-dependent induction of autophagy and apoptosis in control and NMK-treated MDA-MB-231 cells, stained with MDC and Annexin V-FITC in control and presented as dot plot.

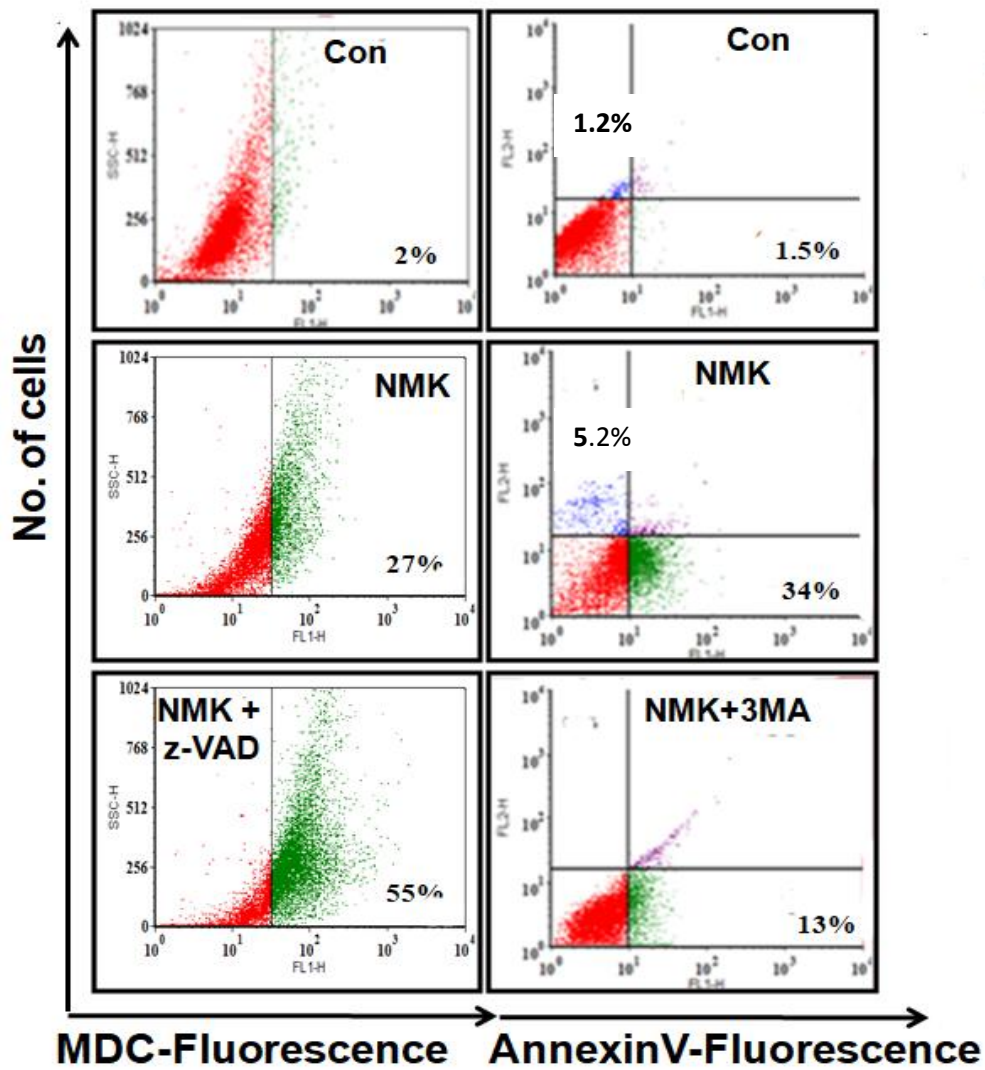

**Fig. S5:** FACS analysis induction of autophagy and apoptosis in control and NMK-treated MDA-MB-231 cells, stained with MDC and Annexin V-FITC in control and presented as dot plot.
